# Supplementary material for: G Protein Activation without a GEF in the Plant Kingdom
Source: PLoS Genet. 2012 Jun 28;8(6):e1002756. doi: 10.1371/journal.pgen.1002756 (PMC3386157; doi:10.1371/journal.pgen.1002756)
Supplement: Figure S3 — Multiple alignments of plant RGS proteins. Full length amino acid sequences were aligned with ClustalW using following settings, gap opening penalty of 10 and gap extension penalty of 0.1 for initial pairwise alignment, gap opening penalty of 10 and gap extension penalty of 0.2 for multiple alignment, and Gonnet protein weight matrix. The transmembrane regions and RGS domains were highlighted with light green and orange. The transmembrane regions were predicted by SOSUI [Hirokawa et al, 1998] using A. thaliana RGS1. [Hirokawa T, Boon-Chieng S, Mitaku S (1998) SOSUI: classification and secondary structure prediction system for membrane proteins. Bioinformatics 14: 378–379.] (PDF) [file pgen.1002756.s003.pdf]

Supplemental figure 3. RGS

|                            |             |           |             |                     |           |           |           |           |           |           |            |           |           |                                    |                                                |                                               |      |      |   |     |   |     |   |     |   |   |   |   |   |   |   |    |    |   |   |   |   |   |   |   |   |   |   |   |   |   |   |   |   |   |   |   |   |   |   |   |   |
|----------------------------|-------------|-----------|-------------|---------------------|-----------|-----------|-----------|-----------|-----------|-----------|------------|-----------|-----------|------------------------------------|------------------------------------------------|-----------------------------------------------|------|------|---|-----|---|-----|---|-----|---|---|---|---|---|---|---|----|----|---|---|---|---|---|---|---|---|---|---|---|---|---|---|---|---|---|---|---|---|---|---|---|---|
| Arabidopsis thaliana RGS1  | - - - - -   | - MASG -  | CALHGGCPSDY | VAVAISVICFFVLLSRS - | VLPCL     | HKAPRTN   | SSSF      | WIPV      | IQVI      | ISSFNLLFS | IMMSVNL    | LRFR      | T         | KHWWRYCYLWAV                       |                                                |                                               |      |      |   |     |   |     |   |     |   |   |   |   |   |   |   |    |    |   |   |   |   |   |   |   |   |   |   |   |   |   |   |   |   |   |   |   |   |   |   |   |   |
| Arabidopsis lyrata         | - - - - -   | - MASG -  | CAIHGGCPSDY | VAVAISVICFFVLLSRS - | VLPCL     | HKAPRTN   | SSSF      | WIPV      | IQVI      | ASFNLLFS  | IMMSVNL    | LRFR      | T         | KHWWRYCYLWAV                       |                                                |                                               |      |      |   |     |   |     |   |     |   |   |   |   |   |   |   |    |    |   |   |   |   |   |   |   |   |   |   |   |   |   |   |   |   |   |   |   |   |   |   |   |   |
| Citrus clementina          | - - - - -   | - MAGSG   | CAVKGCCPTDY | IAlAIASLFFILLLSRL - | ILPFV     | VHKVPRT   | KSSGF     | WIPV      | IQVF      | ASFNLLSLV | LSDNF      | LK        | F         | QRRHWWQSCYIWGV                     |                                                |                                               |      |      |   |     |   |     |   |     |   |   |   |   |   |   |   |    |    |   |   |   |   |   |   |   |   |   |   |   |   |   |   |   |   |   |   |   |   |   |   |   |   |
| Populus trichocarpa        | MMKEEVNGSRS | - -       | CAVQGGCPSDY | IAISIAILAFFLLLSRL - | LFPFL     | HKIPRTN   | SGGF      | WIPV      | IQVFGS    | FNLLLS    | IVMSIN     | LF        | K         | EKSHWWQSCYVWAV                     |                                                |                                               |      |      |   |     |   |     |   |     |   |   |   |   |   |   |   |    |    |   |   |   |   |   |   |   |   |   |   |   |   |   |   |   |   |   |   |   |   |   |   |   |   |
| Ricinus communis           | - - - - -   | - - - - - | - - - - -   | - - - - -           | - - - - - | - - - - - | - - - - - | - - - - - | - - - - - | - - - - - | - - - - -  | - - - - - | - - - - - | - - - - -                          |                                                |                                               |      |      |   |     |   |     |   |     |   |   |   |   |   |   |   |    |    |   |   |   |   |   |   |   |   |   |   |   |   |   |   |   |   |   |   |   |   |   |   |   |   |
| Manihot esculenta          | - - - - -   | - MAS -   | CAVEGGCATDY | IAISISIIISILLLSRS - | IFPFLV    | HKVPR     | INGSGF    | WIPV      | IQVFGS    | FNLLLS    | IVMSVNF    | LK        | F         | EKSHWWQSCYVWAV                     |                                                |                                               |      |      |   |     |   |     |   |     |   |   |   |   |   |   |   |    |    |   |   |   |   |   |   |   |   |   |   |   |   |   |   |   |   |   |   |   |   |   |   |   |   |
| Eucalyptus grandis         | - - - - -   | - MAG -   | CAGEGGCPSDY | VAVAISFLSLILLLYRS - | ILPFV     | HKFSTR    | KSGGF     | WIPV      | IQVF      | ASFNLLLS  | IVMSVDL    | LK        | F         | EKSHWWQSCYVWAV                     |                                                |                                               |      |      |   |     |   |     |   |     |   |   |   |   |   |   |   |    |    |   |   |   |   |   |   |   |   |   |   |   |   |   |   |   |   |   |   |   |   |   |   |   |   |
| Cucumis sativus            | - - - - -   | - MAR -   | CAVDGGCPSDY | IAIVFAAVCALLIRFW -  | ILPYVMY   | KIPL      | PKGSF     | WIPV      | IQVF      | ASFNLLLS  | IVISVNF    | KKF       | K         | RQKWRSCYIWAV                       |                                                |                                               |      |      |   |     |   |     |   |     |   |   |   |   |   |   |   |    |    |   |   |   |   |   |   |   |   |   |   |   |   |   |   |   |   |   |   |   |   |   |   |   |   |
| Prunus persica             | - - - - -   | - MAS -   | CAVYGGCASDY | IAIASAVFFILLLSRL -  | ILPFA     | HKIPL     | PKRSSF    | WIPV      | IQVF      | ASFNLLLS  | IVMSVNF    | LK        | F         | EKSHWWQSCYAWAV                     |                                                |                                               |      |      |   |     |   |     |   |     |   |   |   |   |   |   |   |    |    |   |   |   |   |   |   |   |   |   |   |   |   |   |   |   |   |   |   |   |   |   |   |   |   |
| Mimulus guttatus           | - - - - -   | - MAT -   | CAVNGGCPSDY | AAVSISSLIFLLIGKA -  | VAPHL     | HKIALP    | KGSSF     | WLV       | TIQ       | IASFNLL   | IVSIVMSLGF | LR        | F         | KKHWWSSCYIWAV                      |                                                |                                               |      |      |   |     |   |     |   |     |   |   |   |   |   |   |   |    |    |   |   |   |   |   |   |   |   |   |   |   |   |   |   |   |   |   |   |   |   |   |   |   |   |
| Vitis vinifera             | - - - - -   | - MGS -   | CGKNGCPSDY  | IAVAISLLCFILLIKA -  | TLPFLV    | HKVPR     | PKGSF     | WIPV      | IQVF      | ASFNLLLS  | IVMSIN     | LF        | K         | EKSHWWQSCYLWAV                     |                                                |                                               |      |      |   |     |   |     |   |     |   |   |   |   |   |   |   |    |    |   |   |   |   |   |   |   |   |   |   |   |   |   |   |   |   |   |   |   |   |   |   |   |   |
| Medicago truncatula        | - - - - -   | - MANFK   | CAVKGCCPTDY | VAVTVSILSIFLLLIWS - | IFPFLV    | HKVPR     | T         | KSGGF     | WIPV      | IQVF      | ASFNLLLS   | IMMSHNF   | KK        | F                                  | EKSHWWQSCYLWAV                                 |                                               |      |      |   |     |   |     |   |     |   |   |   |   |   |   |   |    |    |   |   |   |   |   |   |   |   |   |   |   |   |   |   |   |   |   |   |   |   |   |   |   |   |
| Glycine max RGS1           | - - - - -   | - - - - - | - - - - -   | - - - - -           | - - - - - | - - - - - | - - - - - | - - - - - | - - - - - | - - - - - | - - - - -  | - - - - - | - - - - - | - - - - -                          |                                                |                                               |      |      |   |     |   |     |   |     |   |   |   |   |   |   |   |    |    |   |   |   |   |   |   |   |   |   |   |   |   |   |   |   |   |   |   |   |   |   |   |   |   |
| Glycine max RGS2           | - - - - -   | - - - - - | - - - - -   | - - - - -           | - - - - - | - - - - - | - - - - - | - - - - - | - - - - - | - - - - - | - - - - -  | - - - - - | - - - - - | - - - - -                          |                                                |                                               |      |      |   |     |   |     |   |     |   |   |   |   |   |   |   |    |    |   |   |   |   |   |   |   |   |   |   |   |   |   |   |   |   |   |   |   |   |   |   |   |   |
| Phoenix dactylifera        | - - - - -   | - - - - - | - - - - -   | - - - - -           | - - - - - | - - - - - | - - - - - | - - - - - | - - - - - | - - - - - | - - - - -  | - - - - - | - - - - - | - - - - -                          |                                                |                                               |      |      |   |     |   |     |   |     |   |   |   |   |   |   |   |    |    |   |   |   |   |   |   |   |   |   |   |   |   |   |   |   |   |   |   |   |   |   |   |   |   |
| Picea glauca               | - - - - -   | - MMP -   | GYVPGGHPSDY | VAVGFSILTLTLII      | FLCV      | TAF       | AWNV      | HKV       | PKINT     | NHF       | QLLV       | IQ        | T         | IGSISFLISLMMSINLLKFGHGHFWQSCYLWTV  |                                                |                                               |      |      |   |     |   |     |   |     |   |   |   |   |   |   |   |    |    |   |   |   |   |   |   |   |   |   |   |   |   |   |   |   |   |   |   |   |   |   |   |   |   |
| Pinus taeda                | - - - - -   | - MTP -   | KYVPGGHPSDY | VAVGISLALTLII       | FLCG      | TAF       | AWNV      | HKV       | PKINT     | NHF       | QLLV       | IQ        | T         | IGSITFLISLMMSVNLKFGHGHFWQSCYLWTV   |                                                |                                               |      |      |   |     |   |     |   |     |   |   |   |   |   |   |   |    |    |   |   |   |   |   |   |   |   |   |   |   |   |   |   |   |   |   |   |   |   |   |   |   |   |
| Selaginella moellendorffii | - - - - -   | - MTN -   | CRTVGGCVSDY | VAAGITFFVIFLVCI     | GI -      | CFVS      | IKRR      | QLE       | LNA       | KKV       | SV         | LLV       | QAF       | ASLIYLVSSLSMSLNYLRLSRRLHWQNCDLML - |                                                |                                               |      |      |   |     |   |     |   |     |   |   |   |   |   |   |   |    |    |   |   |   |   |   |   |   |   |   |   |   |   |   |   |   |   |   |   |   |   |   |   |   |   |
| Setaria Italica            | - - - - -   | - - - - - | - - - - -   | - - - - -           | - - - - - | - - - - - | - - - - - | - - - - - | - - - - - | - - - - - | - - - - -  | - - - - - | - - - - - | - - - - -                          |                                                |                                               |      |      |   |     |   |     |   |     |   |   |   |   |   |   |   |    |    |   |   |   |   |   |   |   |   |   |   |   |   |   |   |   |   |   |   |   |   |   |   |   |   |
| Arabidopsis thaliana RGS1  | WIEG        | PLGF      | GLLMSCRITQ  | AFQLY               | F         | FVKRR     | LPPV      | KSYIF     | LPLV      | LLPW      | IFGAA      | I         | HAT       | K                                  | PLNDK - - - CHMGLQWTFPVAGLHALYVLALIAFTRAVRHVEF |                                               |      |      |   |     |   |     |   |     |   |   |   |   |   |   |   |    |    |   |   |   |   |   |   |   |   |   |   |   |   |   |   |   |   |   |   |   |   |   |   |   |   |
| Arabidopsis lyrata         | WIEG        | PLGF      | GLLMGCRI    | TA                  | FQLY      | F         | FVKRR     | LPPV      | KSYIF     | LPLV      | LLPW       | IFGAA     | I         | HAT                                | K                                              | PLNDK - - - CHMRQWTFPVAGLHALYVLALIAFTRAVRHVEF |      |      |   |     |   |     |   |     |   |   |   |   |   |   |   |    |    |   |   |   |   |   |   |   |   |   |   |   |   |   |   |   |   |   |   |   |   |   |   |   |   |
| Citrus clementina          | WIEG        | PLGF      | GLLMSCRITQ  | AFQLY               | F         | FVKRR     | LPPV      | KSYIF     | LPLV      | LLPW      | IFGAA      | I         | HAT       | K                                  | PLNDK - - - CHMRVHWIIPFLFLHVYVVASLVGFMAAIRHIEF |                                               |      |      |   |     |   |     |   |     |   |   |   |   |   |   |   |    |    |   |   |   |   |   |   |   |   |   |   |   |   |   |   |   |   |   |   |   |   |   |   |   |   |
| Populus trichocarpa        | WIEG        | PLGF      | GLLLSCR     | IA                  | QAFQLHH   | FVKR      | QLPPI     | RSYF      | LPL       | ILLPW     | IAGAA      | F         | VHV       | KR                                 | PLNDR - - - CHMGTHWIVPVVCLHTIYVAALVGTFAIRHIEF  |                                               |      |      |   |     |   |     |   |     |   |   |   |   |   |   |   |    |    |   |   |   |   |   |   |   |   |   |   |   |   |   |   |   |   |   |   |   |   |   |   |   |   |
| Ricinus communis           | WIEG        | PLGF      | GLLLSCR     | IA                  | QAFQLY    | FVKR      | RLPPI     | RSYIF     | LPLV      | ILLPW     | IAGAA      | F         | IHV       | KK                                 | PLNAR - - - CHMETHWIPVVICLHASFI                |                                               |      |      |   |     |   |     |   |     |   |   |   |   |   |   |   |    |    |   |   |   |   |   |   |   |   |   |   |   |   |   |   |   |   |   |   |   |   |   |   |   |   |
| Manihot esculenta          | WIEG        | PLGF      | GLLLSCR     | IA                  | QAFQLY    | FVKR      | RLPPI     | RSYIF     | LPLV      | ILLPW     | IAGAA      | F         | IHV       | KK                                 | PLNTR - - - CHMGTHWIPVVICLHASFI                |                                               |      |      |   |     |   |     |   |     |   |   |   |   |   |   |   |    |    |   |   |   |   |   |   |   |   |   |   |   |   |   |   |   |   |   |   |   |   |   |   |   |   |
| Eucalyptus grandis         | WIEG        | PLGF      | GLLLSCR     | IA                  | QAFQLY    | FVKR      | RLPPI     | RSYIF     | LPLV      | ILLPW     | IAGAA      | F         | IHV       | KK                                 | PLNDR - - - CHMGTHWIPVVICLHASFI                |                                               |      |      |   |     |   |     |   |     |   |   |   |   |   |   |   |    |    |   |   |   |   |   |   |   |   |   |   |   |   |   |   |   |   |   |   |   |   |   |   |   |   |
| Cucumis sativus            | WIEG        | PLGF      | GLLLSCR     | IA                  | QAFQLY    | FVKR      | RLPPI     | RSYIF     | LPLV      | ILLPW     | IAGAA      | F         | IHV       | KK                                 | PLNDR - - - CHMGTHWIPVVICLHASFI                |                                               |      |      |   |     |   |     |   |     |   |   |   |   |   |   |   |    |    |   |   |   |   |   |   |   |   |   |   |   |   |   |   |   |   |   |   |   |   |   |   |   |   |
| Prunus persica             | WIEG        | PLGF      | GLLLSCR     | IA                  | QAFQLY    | FVKR      | RLPPI     | RSYIF     | LPLV      | ILLPW     | IAGAA      | F         | IHV       | KK                                 | PLNDR - - - CHMGTHWIPVVICLHASFI                |                                               |      |      |   |     |   |     |   |     |   |   |   |   |   |   |   |    |    |   |   |   |   |   |   |   |   |   |   |   |   |   |   |   |   |   |   |   |   |   |   |   |   |
| Mimulus guttatus           | WIEG        | PLGF      | GLLLSCR     | IA                  | QAFQLY    | FVKR      | RLPPI     | RSYIF     | LPLV      | ILLPW     | IAGAA      | F         | IHV       | KK                                 | PLNDR - - - CHMGTHWIPVVICLHASFI                |                                               |      |      |   |     |   |     |   |     |   |   |   |   |   |   |   |    |    |   |   |   |   |   |   |   |   |   |   |   |   |   |   |   |   |   |   |   |   |   |   |   |   |
| Vitis vinifera             | WIEG        | PLGF      | GLLLSCR     | IA                  | QAFQLY    | FVKR      | RLPPI     | RSYIF     | LPLV      | ILLPW     | IAGAA      | F         | IHV       | KK                                 | PLNDR - - - CHMGTHWIPVVICLHASFI                |                                               |      |      |   |     |   |     |   |     |   |   |   |   |   |   |   |    |    |   |   |   |   |   |   |   |   |   |   |   |   |   |   |   |   |   |   |   |   |   |   |   |   |
| Medicago truncatula        | WIEG        | PLGF      | GLLLSCR     | IA                  | QAFQLY    | FVKR      | RLPPI     | RSYIF     | LPLV      | ILLPW     | IAGAA      | F         | IHV       | KK                                 | PLNDR - - - CHMGTHWIPVVICLHASFI                |                                               |      |      |   |     |   |     |   |     |   |   |   |   |   |   |   |    |    |   |   |   |   |   |   |   |   |   |   |   |   |   |   |   |   |   |   |   |   |   |   |   |   |
| Glycine max RGS1           | WIEG        | PLGF      | GLLLSCR     | IA                  | QAFQLY    | FVKR      | RLPPI     | RSYIF     | LPLV      | ILLPW     | IAGAA      | F         | IHV       | KK                                 | PLNDR - - - CHMGTHWIPVVICLHASFI                |                                               |      |      |   |     |   |     |   |     |   |   |   |   |   |   |   |    |    |   |   |   |   |   |   |   |   |   |   |   |   |   |   |   |   |   |   |   |   |   |   |   |   |
| Glycine max RGS2           | WIEG        | PLGF      | GLLLSCR     | IA                  | QAFQLY    | FVKR      | RLPPI     | RSYIF     | LPLV      | ILLPW     | IAGAA      | F         | IHV       | KK                                 | PLNDR - - - CHMGTHWIPVVICLHASFI                |                                               |      |      |   |     |   |     |   |     |   |   |   |   |   |   |   |    |    |   |   |   |   |   |   |   |   |   |   |   |   |   |   |   |   |   |   |   |   |   |   |   |   |
| Phoenix dactylifera        | WIEG        | PLGF      | GLLMSCR     | IA                  | QAFQLY    | FVKR      | RLPPI     | RSYIF     | LPLV      | ILLPW     | IAGAA      | F         | IHV       | KK                                 | PLNDR - - - CHMGTHWIPVVICLHASFI                |                                               |      |      |   |     |   |     |   |     |   |   |   |   |   |   |   |    |    |   |   |   |   |   |   |   |   |   |   |   |   |   |   |   |   |   |   |   |   |   |   |   |   |
| Picea glauca               | WIEG        | PLGF      | GLLMSCR     | IA                  | QAFQLY    | FVKR      | RLPPI     | RSYIF     | LPLV      | ILLPW     | IAGAA      | F         | IHV       | KK                                 | PLNDR - - - CHMGTHWIPVVICLHASFI                |                                               |      |      |   |     |   |     |   |     |   |   |   |   |   |   |   |    |    |   |   |   |   |   |   |   |   |   |   |   |   |   |   |   |   |   |   |   |   |   |   |   |   |
| Pinus taeda                | WIEG        | PLGF      | GLLMSCR     | IA                  | QAFQLY    | FVKR      | RLPPI     | RSYIF     | LPLV      | ILLPW     | IAGAA      | F         | IHV       | KK                                 | PLNDR - - - CHMGTHWIPVVICLHASFI                |                                               |      |      |   |     |   |     |   |     |   |   |   |   |   |   |   |    |    |   |   |   |   |   |   |   |   |   |   |   |   |   |   |   |   |   |   |   |   |   |   |   |   |
| Selaginella moellendorffii | WIEG        | PLGF      | GLLMSCR     | IA                  | QAFQLY    | FVKR      | RLPPI     | RSYIF     | LPLV      | ILLPW     | IAGAA      | F         | IHV       | KK                                 | PLNDR - - - CHMGTHWIPVVICLHASFI                |                                               |      |      |   |     |   |     |   |     |   |   |   |   |   |   |   |    |    |   |   |   |   |   |   |   |   |   |   |   |   |   |   |   |   |   |   |   |   |   |   |   |   |
| Setaria Italica            | WIEG        | PLGF      | GLLMSCR     | IA                  | QAFQLY    | FVKR      | RLPPI     | RSYIF     | LPLV      | ILLPW     | IAGAA      | F         | IHV       | KK                                 | PLNDR - - - CHMGTHWIPVVICLHASFI                |                                               |      |      |   |     |   |     |   |     |   |   |   |   |   |   |   |    |    |   |   |   |   |   |   |   |   |   |   |   |   |   |   |   |   |   |   |   |   |   |   |   |   |
| Arabidopsis thaliana RGS1  | RFDE        | LDL       | WKGI        | LV                  | SATS      | I         | I         | WV        | TAF       | VLNE      | I          | H         | EE        | I                                  | SWLQV                                          | ASR                                           | FVLL | VTGG | I | LVV | V | FFS | I | SSN | Q | P | L | L | S | Q | I | SL | KK | R | Q | N | F | E | F | - | Q | R | M | G | A | L | G | I | P | D | S | G | L | L | F | R | K |
| Arabidopsis lyrata         | RFDE        | LDL       | WKGI        | LV                  | SATS      | I         | I         | WV        | TAF       | VLNE      | I          | H         | EE        | I                                  | SWLQV                                          | ASR                                           | FVLL | VTGG | I | LVV | V | FFS | I | SSN | Q | P | L | L | S | Q | I | SL | KK | R | Q | N | F | E | F | - | Q | R | M | G | A | L | G | I | P | D | S | G | L | L | F | R | K |
| Citrus clementina          | RFDE        | LDL       | WKGI        | LV                  | SATS      | I         | I         | WV        | TAF       | VLNE      | I          | H         | EE        | I                                  | SWLQV                                          | ASR                                           | FVLL | VTGG | I | LVV | V | FFS | I | SSN | Q | P | L | L | S | Q | I | SL | KK | R | Q | N | F | E | F | - | Q | R | M | G | A | L | G | I | P | D | S | G | L | L | F | R | K |
| Populus trichocarpa        | RFDE        | LDL       | WKGI        | LV                  | SATS      | I         | I         | WV        | TAF       | VLNE      | I          | H         | EE        | I                                  | SWLQV                                          | ASR                                           | FVLL | VTGG | I | LVV | V | FFS | I | SSN | Q | P | L | L | S | Q | I | SL | KK | R | Q | N | F | E | F | - | Q | R | M | G | A | L | G | I | P | D | S | G | L | L | F | R | K |
| Ricinus communis           | RFDE        | LDL       | WKGI        | LV                  | SATS      | I         | I         | WV        | TAF       | VLNE      | I          | H         | EE        | I                                  | SWLQV                                          | ASR                                           | FVLL | VTGG | I | LVV | V | FFS | I | SSN | Q | P | L | L | S | Q | I | SL | KK | R | Q | N | F | E | F | - | Q | R | M | G | A | L | G | I | P | D | S | G | L | L | F | R | K |
| Manihot esculenta          | RFDE        | LDL       | WKGI        | LV                  | SATS      | I         | I         | WV        | TAF       | VLNE      | I          | H         | EE        | I                                  | SWLQV                                          | ASR                                           | FVLL | VTGG | I | LVV | V | FFS | I | SSN | Q | P | L | L | S | Q | I | SL | KK | R | Q | N | F | E | F | - | Q | R | M | G | A | L | G | I | P | D | S | G | L | L | F | R | K |
| Eucalyptus grandis         | RFDE        | LDL       | WKGI        | LV                  | SATS      | I         | I         | WV        | TAF       | VLNE      | I          | H         | EE        | I                                  | SWLQV                                          | ASR                                           | FVLL | VTGG | I | LVV | V | FFS | I | SSN | Q | P | L | L | S | Q | I | SL | KK | R | Q | N | F | E | F | - | Q | R | M | G | A | L | G | I | P | D | S | G | L | L | F | R | K |
| Cucumis sativus            | RFDE        | LDL       | WKGI        | LV                  | SATS      | I         | I         | WV        | TAF       | VLNE      | I          | H         | EE        | I                                  | SWLQV                                          | ASR                                           | FVLL | VTGG | I | LVV | V | FFS | I | SSN | Q | P | L | L | S | Q | I | SL | KK | R | Q | N | F | E | F | - | Q | R | M | G | A | L | G | I | P | D | S | G | L | L | F | R | K |
| Prunus persica             | RFDE        | LDL       | WKGI        | LV                  | SATS      | I         | I         | WV        | TAF       | VLNE      | I          | H         | EE        | I                                  | SWLQV                                          | ASR                                           | FVLL | VTGG | I | LVV | V | FFS | I | SSN | Q | P | L | L | S | Q | I | SL | KK | R | Q | N | F | E | F | - | Q | R | M | G | A | L | G | I | P | D | S | G | L | L | F | R | K |
| Mimulus guttatus           | RFDE        | LDL       | WKGI        | LV                  | SATS      | I         | I         | WV        | TAF       | VLNE      | I          | H         | EE        | I                                  | SWLQV                                          | ASR                                           | FVLL | VTGG | I | LVV | V | FFS | I | SSN | Q | P | L | L | S | Q | I | SL | KK | R | Q | N | F | E | F | - | Q | R | M | G | A | L | G | I | P | D | S | G | L | L | F | R | K |
| Vitis vinifera             | RFDE        | LDL       | WKGI        | LV                  | SATS      | I         | I         | WV        | TAF       | VLNE      | I          | H         | EE        | I                                  | SWLQV                                          | ASR                                           | FVLL | VTGG | I | LVV | V | FFS | I | SSN | Q | P | L | L | S | Q | I | SL | KK | R | Q | N | F | E | F | - | Q | R | M | G | A | L | G | I | P | D | S | G | L | L | F | R | K |
| Medicago truncatula        | RFDE        | LDL       | WKGI        | LV                  | SATS      | I         | I         | WV        | TAF       | VLNE      | I          | H         | EE        | I                                  | SWLQV                                          | ASR                                           | FVLL | VTGG | I | LVV | V | FFS | I | SSN | Q | P | L | L | S | Q | I | SL | KK | R | Q | N | F | E | F | - | Q | R | M | G | A | L | G | I | P | D | S | G | L | L | F | R | K |
| Glycine max RGS1           | RFDE        | LDL       | WKGI        | LV                  | SATS      | I         | I         | WV        | TAF       | VLNE      | I          | H         | EE        | I                                  | SWLQV                                          | ASR                                           | FVLL | VTGG | I | LVV | V | FFS | I | SSN | Q | P | L | L | S | Q | I | SL | KK | R | Q | N | F | E | F | - | Q | R | M | G | A | L | G | I | P | D | S | G | L | L | F | R | K |
| Glycine max RGS2           | RFDE        | LDL       | WKGI        | LV                  | SATS      | I         | I         | WV        | TAF       | VLNE      | I          | H         | EE        | I                                  | SWLQV                                          | ASR                                           | FVLL | VTGG | I | LVV | V | FFS | I | SSN | Q | P | L | L | S | Q | I | SL | KK | R | Q | N | F | E | F | - | Q | R | M | G | A | L | G | I | P | D | S | G | L | L | F | R | K |
| Phoenix dactylifera        | RFDE        | LDL       | WKGI        | LV                  | SATS      | I         | I         | WV        | TAF       | VLNE      | I          | H         | EE        | I                                  | SWLQV                                          | ASR                                           | FVLL | VTGG | I | LVV | V | FFS | I | SSN | Q | P | L | L | S | Q | I | SL | KK | R | Q | N | F | E | F | - | Q | R | M | G | A | L | G | I | P | D | S | G | L | L | F | R | K |
| Picea glauca               | RFDE        | LDL       | WKGI        | LV                  | SATS      | I         | I         | WV        | TAF       | VLNE      | I          | H         | EE        | I                                  | SWLQV                                          | ASR                                           | FVLL | VTGG | I | LVV | V | FFS | I | SSN | Q | P | L | L | S | Q | I | SL | KK | R | Q | N | F | E | F | - | Q | R | M | G | A | L | G | I | P | D | S | G | L | L | F | R | K |
| Pinus taeda                | RFDE        | LDL       | WKGI        | LV                  | SATS      | I         | I         | WV        | TAF       | VLNE      | I          | H         | EE        | I                                  | SWLQV                                          | ASR                                           | FVLL | VTGG | I | LVV | V | FFS | I | SSN | Q | P | L | L | S | Q | I | SL | KK |   |   |   |   |   |   |   |   |   |   |   |   |   |   |   |   |   |   |   |   |   |   |   |   |

Supplemental figure 3. RGS

|                            |                                                                                                                                                                                                           |
|----------------------------|-----------------------------------------------------------------------------------------------------------------------------------------------------------------------------------------------------------|
| Arabidopsis thaliana RGS1  | E E F R P V D P N E P L D K L L L N K R F R S F M E F A D S C Y A G E T L H F F E E V Y E H G K I P E D - D S I R R I Y M A R H I M E K F I V A G A E M E L N L S H K T R Q E I L T T Q D L T H T D L     |
| Arabidopsis lyrata         | E E Y R P V D P N E P L D K L L L N K R F R S F M E F A D S C Y A G E T L H F F E E V Y E H G K I P V D - D S I R R I Y M A R H I M E K F I V S G A E M E V N L S H K T R Q E I L T T Q D L T H S D L     |
| Citrus clementina          | E P T P V I D P N E P L D K L L L N K K F R Q S F M A F A D S C L A G E S V H F F E E V H E H G K I P V D - D H V R R I Y M A R H I I E K Y I V A G A S M E V N I S H R T R Q E I L T T S N L A R P D L   |
| Populus trichocarpa        | D S V P V I D P N E P L D K L L L N K R F R Q S F M A F A D S C L A G E S V H F Y N E V H E H D K I P V D - D P V R R I Y M A R H I I E K Y I V A G A S M E V N I S Y R T R Q E I L T T T N L A H P D L   |
| Ricinus communis           | D P A P V V D P N E P L D K L L Q D K R F R Q S F M A F A D S C L A G E N V H F Y N E V H E R G K I P L D - D T V R R I Y M A R H I I E K Y I V A G A A M E V N I S H R T R E E I L N T A N L A H P D L   |
| Manihot esculenta          | D P A P V I D P N E P L D K L L L N K R F R Q S F M D F A D S C L A G E S V H F Y N E V H E R G K I P I D - D T I R R I Y M T R H I I E K Y I V A G A A M E V N I S H R T R Q E I L T T V D L A H P D L   |
| Eucalyptus grandis         | E P S Q A I D P D E P L D K L L L N K R F R Q S F M A F A D S C L A G E S V H F H D D V H E L G K I P V N - D S V R R I Y M A R D I I D K Y I T A G A P M E V N I S Y R C R Q D I L M T S N L A H P D L   |
| Cucumis sativus            | E P E T V I D P N E P L E K L L L N K R F R S F M A F A D S C L A G E N V H F Y D E V H E L G K I P L D - D P V R R I Y M A R H I I D N Y I T P G A T M E V N I S H R C R Q E I L T T S D L A D P N L     |
| Prunus persica             | E P A P V I D P N E P L D K L L L M N K R F R Q S F M S F A D S C L A G E S V H F Y E E V H E L G K I P V D - D P V R R I Y M A R H I I D K Y I T A G A T M E V N I S H R S R Q A I L T T S N L A Q P N L |
| Mimulus guttatus           | E S L Q S V D S N E P F D K L L S N R R F R Q S F M E F A D S C L A G E S V H F Y E E V Q Q L D R I P D S - D H V R R I Y M A R H I I D R Y I A P G A T M E V N I S H R C R Q E I L S T L D L A H A N L   |
| Vitis vinifera             | E P A P D I D P N E P L D K L L L N K G F R Q S F M A F A D S C L A G E S V H F Y D E V H E L A K I P V D - D P V R R I Y M A R H I I E K Y I V A G A T M E V N I S H R N R Q E I L T T P D L A H P D L   |
| Medicago truncatula        | E P I S R V D P N E P L D K L L L N K K F R Q S F M G F A D S C L A G E S V H F F D E V H E L S K I S E H - D C V R R I Y M A R H I I E K Y M V A G A A M E I N I S H R S K Q E I L S T S D L A R A D L   |
| Glycine max RGS1           | E P I S R I D P N E P L D K L L L N K R F R Q S F M A F A D S C L A G E S V H F F D E V Y E L S K I P E D - D C V K R I Y M A R H I I E K Y I V A G A A M E V N I S H R S R Q E I L S T S N L T R P D L   |
| Glycine max RGS2           | E P I S R I D P N E P L D K L L L N K R F R L S F M A F A D S C L A G E S V H F F D E V Y E L S K I P E D - D C V R R I Y M A R H I I E K Y I I A G V A M E V N I S H R S R Q E I L S T S S L T R P D L   |
| Phoenix dactylifera        | A S V A G V D L H Q P L D K L L Q D K R F R Q S F M D F A D S C L A G E S V H F F E E V H E L G K I P L D - D P V R R I Y M A R H I I E N Y I V T G A E M E I N I S H R T R Q E I L G T L D L A H P D L   |
| Picea glauca               | G - - M P L N L D E P L E K L L R Q K I F R Q S F M A F A D S R M A G E S V H F Y D E V H E L N K I P I G - D T A R R I Y M A G H I I E Q Y I A V D S P M E I N I S H Q M R Q E I L N T T D L A H P D L   |
| Pinus taeda                | G - - M P L N L D E P L E K L L R Q K F R E S F M A F A D S R M A G E S V H F Y D E V H E L N K I P T G - D T A R R I Y M A G H I I E Q Y I A V D S P M E I N I S H Q M R Q E I L D T T D L A H P D L     |
| Selaginella moellendorffii | L I A F N F N - - R P L E L L L E H R R F R Q S Y L A F A D S R M A G E S V H F Y S E V R E L N K L Q Q Q H Q V V Q R I Y M A E H I I D K Y I K S G A P M E I N I S H Q M R L D I I N T T D L A D P D L   |
| Setaria Italica            | I N A T H F D S N Q P L D K L L E D K R F R M S F M S F A D S C L A G E S V H F Y E E V Y D L K K I H L D - D S I R R I Y M A R H I I E K Y I D A G A E M E I N I S H R T R Q E I L G T P D L T H P N L   |
| Arabidopsis thaliana RGS1  | F K N A L N E V M Q L I K M N L V R D Y W S S I Y F I K F K E E E - - - - S C H E A M H K E G Y S F - - - - - S S P R L S S V Q G S D D P F Y Q E H M S K S S R C S S P G - - - - -                       |
| Arabidopsis lyrata         | F K N A L N E V M Q L I K M N L V R D Y W T S I Y F I K F K E E E - - - - S C E A M Q K E G W S F - - - - - S S P R L S S V Q G S D D P F Y Q E H M S K S S R C S S P G - - - - -                         |
| Citrus clementina          | F N N A I N E L M Q L V K M N L A K D Y W S S M F F I K L K E E A S M R A T G H E L E Q M - G W N - - - - - F S P R W S S V H C A D D P F H D E Q F S K G S E H S S H D L D P - - - - -                   |
| Populus trichocarpa        | F N N A L N E L M Q L M K T N L K D Y W S S M F F I K F K - E A N M R F N G H E Q E S M A G W N - - - - - F S P R L S S V R G A D D P F H Q E H V L K G F G C D N R D L D T Q - - - -                     |
| Ricinus communis           | F N K A I N E L L Q L M K T N L A K D Y W S S M F F I K F K E E A S L R S H S H D P E Q M A V W N - - - - - F S P R L S S V H G L D D P F H Q E P H V K G S G C T G H D L D A R C Q E L                   |
| Manihot esculenta          | F N K A I N E L L Q L M K M N L G K D Y W T S M F F I K F K E E A N M R S S D H L E Q M A G W N - - - - - F S P R L S S V H G A D D P F H Q E H P V K D T G C N N H G S D T R S Q E L                     |
| Eucalyptus grandis         | F N N A L N E L L Q L M K M N L A K D Y W S S T F F L K F K E E A S M R L D A H E M E P M T G W N - - - - - F S P R L S G V R G A D D P F H Q E Y L T K D S D H S S G N T D A T - - - -                   |
| Cucumis sativus            | F N N A L N E L I Q L I K M N L A K D F W S S M F F L K L K E E T S M R S N G R D L E Q M A S W N - - - - - L S P R L S S V Q G T D D P F N Q E Q F S K G S G H D S T H D S D H - - - -                   |
| Prunus persica             | F N D A L N E L I Q L M K M N L A N D Y W S S T Y F M K F K E E A S L R S - - H E L Q Q M T S W N S - - - - - P T P R L S S V R G V D D P F H Q E Q E P - - - - -                                         |
| Mimulus guttatus           | F K N A L I E L I H L M K M N L A N D Y W S S T F Y M K L K D E A A M K T V D H E L E T G - G W N - - - - - F S Q R L S S V H C T D D P F H Q E H S P R K L G S S T N R D T E L Q L R E                   |
| Vitis vinifera             | F N N A L N E L L Q L M K M N L A K D Y W S S M F F K K L R - E D G T G S N G H E L E V V T G W N - - - - - Y S P R L S C V H G E D D P F H E E H P S K S S A H D T N T Q D V E Q Q - -                   |
| Medicago truncatula        | F H N A L N E I V H L M K T N L A K D Y W S S M F F L K F Q E E C D M R C N G Y E L E Q M T G W N - - - - - Y S P R L S S V H G T D D P F H D H L L K N S E C G N D T D S - - - -                         |
| Glycine max RGS1           | F H N A L N E I I Q L M R T N L A R D Y W S S M F F L K F Q E D S N V R S N E Y E L E Q I T G W N - - - - - F S P R L S S V H G T D D P F H Q D H L L K S S G C S N D T T N L - - - -                     |
| Glycine max RGS2           | F H N A L N E I I Q L M K T N L A R D Y W S S M F F L K F Q E D T N V R S N E Y E L E Q M T G W N - - - - - F S P R L S S V H G I D D P F H Q D H L L K S S G C S N D T T D L - - - -                     |
| Phoenix dactylifera        | F N H A V N E M M Q L M K M N L L K D Y W S S M N F V K F K E E N P R Q P D S S E P - - - A G W D - - - - - L S P R L S C V R C T D N P F N H E Q L H K C P S G R K C D V - - - -                         |
| Picea glauca               | F T N A V N E M V R M M Q M N L E K D Y W N S T F Y S R F K E E I K D V A E A S D V W D N T T I W D - - - - - Y S P K V S F V H G T D D P F D Q D S L C R N S D G S W Q S S M K N N N A Y                 |
| Pinus taeda                | F T N V V N E M V R M M Q M N L E K D Y Q N S T F Y S R F K E E I R D A A E A C E L W D N T T I W D - - - - - Y S P K V S F V H G T D D P F D H D S L C R N S E G - - - - -                               |
| Selaginella moellendorffii | F K R A V G E V L K M M Q M N L S N D Y W Q S E Y F Q E L K D E L D A D V E S Q Q T G D D L E Q Q L D V T A T K R A L R R L Y D P T P D N P F D Q G C P F S G E L R K E N Q P E Q H H T G E S Q S Q R S   |
| Setaria Italica            | F D S A V S E I L Q L I K M N L A K D Y W S S L H F A K L K E D I E R G P N G P E L - - - M P L D - - - - - Y S P R V T F V R C T D D P F Y E E H A A T C N - - - - -                                     |
| Arabidopsis thaliana RGS1  | - - - - -                                                                                                                                                                                                 |
| Arabidopsis lyrata         | - - - - -                                                                                                                                                                                                 |
| Citrus clementina          | - - - - -                                                                                                                                                                                                 |
| Populus trichocarpa        | - - - - -                                                                                                                                                                                                 |
| Ricinus communis           | - - - - -                                                                                                                                                                                                 |
| Manihot esculenta          | - - - - -                                                                                                                                                                                                 |
| Eucalyptus grandis         | - - - - -                                                                                                                                                                                                 |
| Cucumis sativus            | - - - - -                                                                                                                                                                                                 |
| Prunus persica             | - - - - -                                                                                                                                                                                                 |
| Mimulus guttatus           | K F P - - - - -                                                                                                                                                                                           |
| Vitis vinifera             | - - - - -                                                                                                                                                                                                 |
| Medicago truncatula        | - - - - -                                                                                                                                                                                                 |
| Glycine max RGS1           | - - - - -                                                                                                                                                                                                 |
| Glycine max RGS2           | - - - - -                                                                                                                                                                                                 |
| Phoenix dactylifera        | - - - - -                                                                                                                                                                                                 |
| Picea glauca               | P - - - - -                                                                                                                                                                                               |
| Pinus taeda                | - - - - -                                                                                                                                                                                                 |
| Selaginella moellendorffii | E I L L T S Q D T T L P R S                                                                                                                                                                               |
| Setaria Italica            | - - - - -                                                                                                                                                                                                 |
